# Supplementary material
Source: HighWire-hosted journal article supplement (http://dmd.aspetjournals.org/highwire/filestream/80752/field_highwire_adjunct_files/0/1353_supp_data.pdf)
Supplement: 1353_supp_data.pdf [file 1353_supp_data.pdf]

## **Supplemental data**

### **The Potentially Significant Role of CYP3A-Mediated Oxidative Metabolism of Dabigatran Etextilate and its Intermediate Metabolites in Drug-Drug Interaction Assessments Using Microdose Dabigatran Etextilate**

Udomsak Udomnilobol, Suree Jianmongkol, Thomayant Prueksaritanont

Department of Pharmacology and Physiology, Faculty of Pharmaceutical Sciences,  
Chulalongkorn University, Bangkok, Thailand (U.U., S.J.).

Chulalongkorn University Drug Discovery and Drug Development Research Center  
(Chula4DR), Chulalongkorn University, Bangkok, Thailand (U.U., T.P.).

Supp. Table 1: BIBR0951 and its metabolites detected in the NADPH-fortified incubations.

| Species  | RT (min) | [M+H] <sup>+</sup> m/z (amu)                                                              | Structures                                                                           | Product ion formula [P] <sup>+</sup> or [P] <sup>+</sup> , m/z (amu)                                                                                                                                                                                                                                                                                                                                                                                                                                                                                                                                                                                                                                                                                      | Detected in*                       |
|----------|----------|-------------------------------------------------------------------------------------------|--------------------------------------------------------------------------------------|-----------------------------------------------------------------------------------------------------------------------------------------------------------------------------------------------------------------------------------------------------------------------------------------------------------------------------------------------------------------------------------------------------------------------------------------------------------------------------------------------------------------------------------------------------------------------------------------------------------------------------------------------------------------------------------------------------------------------------------------------------------|------------------------------------|
| M324     | 1.43     | [C <sub>17</sub> H <sub>18</sub> N <sub>5</sub> O <sub>2</sub> ] <sup>+</sup><br>324.1461 | 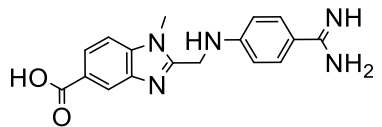   | [C <sub>8</sub> H <sub>7</sub> N <sub>2</sub> ] <sup>+</sup> , 131.0615; [C <sub>7</sub> H <sub>8</sub> N <sub>2</sub> O] <sup>+</sup> , 136.0626;<br>[C <sub>8</sub> H <sub>10</sub> N <sub>3</sub> ] <sup>+</sup> , 148.0874; [C <sub>10</sub> H <sub>9</sub> N <sub>2</sub> O <sub>2</sub> ] <sup>+</sup> , 189.0664;<br><b>[C<sub>17</sub>H<sub>13</sub>N<sub>4</sub>O]<sup>+</sup>, 289.1079</b>                                                                                                                                                                                                                                                                                                                                                     | HIM<br>rhCYP3A4                    |
| M488     | 1.61     | [C <sub>25</sub> H <sub>26</sub> N <sub>7</sub> O <sub>4</sub> ] <sup>+</sup><br>488.2044 |    | [C <sub>7</sub> H <sub>8</sub> N <sub>2</sub> O] <sup>+</sup> , 136.0626; [C <sub>8</sub> H <sub>10</sub> N <sub>3</sub> ] <sup>+</sup> , 148.0867;<br>[C <sub>8</sub> H <sub>9</sub> N <sub>2</sub> O <sub>2</sub> ] <sup>+</sup> , 165.0661; [C <sub>10</sub> H <sub>8</sub> N <sub>2</sub> O] <sup>+</sup> , 172.0651;<br>[C <sub>10</sub> H <sub>9</sub> N <sub>2</sub> O <sub>2</sub> ] <sup>+</sup> , 189.0666; <b>[C<sub>17</sub>H<sub>13</sub>N<sub>4</sub>O]<sup>+</sup>, 289.1076</b> ;<br>[C <sub>17</sub> H <sub>16</sub> N <sub>5</sub> O] <sup>+</sup> , 306.1336; [C <sub>17</sub> H <sub>18</sub> N <sub>5</sub> O <sub>2</sub> ] <sup>+</sup> , 324.1461                                                                                 | HIM                                |
| DAB      | 1.81     | [C <sub>25</sub> H <sub>26</sub> N <sub>7</sub> O <sub>3</sub> ] <sup>+</sup><br>472.2098 |    | [C <sub>9</sub> H <sub>9</sub> N <sub>2</sub> ] <sup>+</sup> , 145.0765; [C <sub>8</sub> H <sub>10</sub> N <sub>3</sub> ] <sup>+</sup> , 148.0871;<br>[C <sub>10</sub> H <sub>8</sub> N <sub>2</sub> O] <sup>+</sup> , 172.0641; [C <sub>10</sub> H <sub>9</sub> N <sub>2</sub> O <sub>2</sub> ] <sup>+</sup> , 189.0659;<br>[C <sub>15</sub> H <sub>13</sub> N <sub>4</sub> O] <sup>+</sup> , 265.1090; [C <sub>17</sub> H <sub>13</sub> N <sub>4</sub> O] <sup>+</sup> , 289.1086;<br>[C <sub>17</sub> H <sub>16</sub> N <sub>5</sub> O] <sup>+</sup> , 306.1348; [C <sub>17</sub> H <sub>18</sub> N <sub>5</sub> O <sub>2</sub> ] <sup>+</sup> , 324.1462;<br>[C <sub>18</sub> H <sub>17</sub> N <sub>4</sub> O <sub>3</sub> ] <sup>+</sup> , 337.1303 | HLM<br>HIM<br>rhCYP3A4<br>rhCYP3A5 |
| M400     | 1.98     | [C <sub>22</sub> H <sub>22</sub> N <sub>7</sub> O] <sup>+</sup><br>400.1889               |   | [C <sub>8</sub> H <sub>7</sub> N <sub>2</sub> ] <sup>+</sup> , 131.0608; [C <sub>9</sub> H <sub>8</sub> N <sub>2</sub> ] <sup>+</sup> , 144.0686;<br>[C <sub>8</sub> H <sub>10</sub> N <sub>3</sub> ] <sup>+</sup> , 148.0872; [C <sub>10</sub> H <sub>8</sub> N <sub>2</sub> O] <sup>+</sup> , 172.0636;<br>[C <sub>15</sub> H <sub>12</sub> N <sub>4</sub> O] <sup>+</sup> , 264.1011; [C <sub>15</sub> H <sub>13</sub> N <sub>4</sub> O] <sup>+</sup> , 265.1085;<br><b>[C<sub>17</sub>H<sub>13</sub>N<sub>4</sub>O]<sup>+</sup>, 289.1086</b> ; [C <sub>22</sub> H <sub>17</sub> N <sub>6</sub> ] <sup>+</sup> , 365.1513;<br>[C <sub>22</sub> H <sub>19</sub> N <sub>6</sub> O] <sup>+</sup> , 383.1618                                              | HLM<br>HIM<br>rhCYP3A4<br>rhCYP3A5 |
| M516 (1) | 2.03     | [C <sub>27</sub> H <sub>30</sub> N <sub>7</sub> O <sub>4</sub> ] <sup>+</sup><br>516.2377 |  | [C <sub>9</sub> H <sub>9</sub> N <sub>2</sub> ] <sup>+</sup> , 145.0754; [C <sub>10</sub> H <sub>8</sub> N <sub>2</sub> O] <sup>+</sup> , 172.0628;<br>[C <sub>16</sub> H <sub>17</sub> N <sub>5</sub> ] <sup>+</sup> , 279.1482; <b>[C<sub>17</sub>H<sub>13</sub>N<sub>4</sub>O]<sup>+</sup>, 289.1081</b> ;<br><b>[C<sub>17</sub>H<sub>16</sub>N<sub>5</sub>O]<sup>+</sup>, 306.1342</b> ; [C <sub>16</sub> H <sub>17</sub> N <sub>5</sub> O <sub>2</sub> ] <sup>+</sup> , 311.1372;<br>[C <sub>18</sub> H <sub>17</sub> N <sub>4</sub> O <sub>3</sub> ] <sup>+</sup> , 337.1671; [C <sub>25</sub> H <sub>26</sub> N <sub>7</sub> O <sub>3</sub> ] <sup>+</sup> , 472.2472                                                                              | HLM<br>HIM<br>rhCYP3A4             |

|                          |      |                                                                                           |  |                                                                                                                                                                                                                                                                                                                                                                                                                                                                                                                                                                                                                                                                                                                                                                                                                               |                                    |
|--------------------------|------|-------------------------------------------------------------------------------------------|--|-------------------------------------------------------------------------------------------------------------------------------------------------------------------------------------------------------------------------------------------------------------------------------------------------------------------------------------------------------------------------------------------------------------------------------------------------------------------------------------------------------------------------------------------------------------------------------------------------------------------------------------------------------------------------------------------------------------------------------------------------------------------------------------------------------------------------------|------------------------------------|
| <b>M416</b>              | 2.10 | [C <sub>22</sub> H <sub>22</sub> N <sub>7</sub> O <sub>2</sub> ] <sup>+</sup><br>416.1834 |  | [C <sub>7</sub> H <sub>8</sub> N <sub>2</sub> O] <sup>+</sup> , 136.0621; [C <sub>9</sub> H <sub>8</sub> N <sub>2</sub> ] <sup>+</sup> , 144.0697;<br>[C <sub>9</sub> H <sub>9</sub> N <sub>2</sub> ] <sup>+</sup> , 145.0769; [C <sub>10</sub> H <sub>8</sub> N <sub>2</sub> O] <sup>+</sup> , 172.0625;<br>[C <sub>17</sub> H <sub>13</sub> N <sub>4</sub> O] <sup>+</sup> , <b>289.1089</b> ; [C <sub>17</sub> H <sub>16</sub> N <sub>5</sub> O] <sup>+</sup> , 306.1342                                                                                                                                                                                                                                                                                                                                                   | HIM<br>rhCYP3A4                    |
| <b>M516 (2)</b>          | 2.16 | [C <sub>27</sub> H <sub>30</sub> N <sub>7</sub> O <sub>4</sub> ] <sup>+</sup><br>516.2370 |  | [C <sub>9</sub> H <sub>9</sub> N <sub>2</sub> ] <sup>+</sup> , 145.0756; [C <sub>8</sub> H <sub>9</sub> N <sub>2</sub> O <sub>2</sub> ] <sup>+</sup> , 165.0661;<br>[C <sub>10</sub> H <sub>8</sub> N <sub>2</sub> O] <sup>+</sup> , 172.0638; [C <sub>10</sub> H <sub>9</sub> N <sub>2</sub> O <sub>2</sub> ] <sup>+</sup> , 189.0659;<br>[C <sub>10</sub> H <sub>13</sub> N <sub>2</sub> O <sub>2</sub> ] <sup>+</sup> , <b>193.0978</b> ; [C <sub>17</sub> H <sub>13</sub> N <sub>4</sub> O] <sup>+</sup> , <b>289.1091</b> ;<br>[C <sub>17</sub> H <sub>16</sub> N <sub>5</sub> O] <sup>+</sup> , <b>306.1351</b> ; [C <sub>17</sub> H <sub>18</sub> N <sub>5</sub> O <sub>2</sub> ] <sup>+</sup> , 324.1456                                                                                                              | HLM<br>HIM<br>rhCYP3A4<br>rhCYP3A5 |
| <b>BIBR0951 (parent)</b> | 2.45 | [C <sub>27</sub> H <sub>30</sub> N <sub>7</sub> O <sub>3</sub> ] <sup>+</sup><br>500.2406 |  | [C <sub>9</sub> H <sub>8</sub> N <sub>2</sub> ] <sup>+</sup> , 144.0684; [C <sub>9</sub> H <sub>9</sub> N <sub>2</sub> ] <sup>+</sup> , 145.0764;<br>[C <sub>9</sub> H <sub>7</sub> N <sub>2</sub> O] <sup>+</sup> , 159.0556; [C <sub>10</sub> H <sub>8</sub> N <sub>2</sub> O] <sup>+</sup> , 172.0635;<br>[C <sub>10</sub> H <sub>15</sub> N <sub>2</sub> O <sub>2</sub> ] <sup>+</sup> , <b>195.1135</b> ; [C <sub>15</sub> H <sub>12</sub> N <sub>4</sub> O] <sup>+</sup> , 264.1014;<br>[C <sub>16</sub> H <sub>16</sub> N <sub>5</sub> ] <sup>+</sup> , 278.1405; [C <sub>17</sub> H <sub>13</sub> N <sub>4</sub> O] <sup>+</sup> , <b>289.1079</b> ;<br>[C <sub>17</sub> H <sub>16</sub> N <sub>5</sub> O] <sup>+</sup> , <b>306.1349</b> ; [C <sub>22</sub> H <sub>17</sub> N <sub>6</sub> ] <sup>+</sup> , 365.1614 | NA                                 |
| <b>M498 (1)</b>          | 2.51 | [C <sub>27</sub> H <sub>28</sub> N <sub>7</sub> O <sub>3</sub> ] <sup>+</sup><br>498.2257 |  | [C <sub>9</sub> H <sub>8</sub> N <sub>2</sub> ] <sup>+</sup> , 144.0672; [C <sub>9</sub> H <sub>9</sub> N <sub>2</sub> ] <sup>+</sup> , 145.0755;<br>[C <sub>10</sub> H <sub>8</sub> N <sub>2</sub> O] <sup>+</sup> , 172.0639; [C <sub>13</sub> H <sub>15</sub> N <sub>3</sub> O <sub>3</sub> ] <sup>+</sup> , 261.1147;<br>[C <sub>16</sub> H <sub>16</sub> N <sub>5</sub> ] <sup>+</sup> , 278.1396; [C <sub>17</sub> H <sub>13</sub> N <sub>4</sub> O] <sup>+</sup> , <b>289.1089</b> ;<br>[C <sub>17</sub> H <sub>16</sub> N <sub>5</sub> O] <sup>+</sup> , <b>306.1351</b> ; [C <sub>13</sub> H <sub>18</sub> N <sub>4</sub> O <sub>3</sub> ] <sup>+</sup> , 317.1034                                                                                                                                                   | HLM<br>HIM<br>rhCYP3A4<br>rhCYP3A5 |
| <b>M498 (2)</b>          | 2.85 | [C <sub>27</sub> H <sub>28</sub> N <sub>7</sub> O <sub>3</sub> ] <sup>+</sup><br>498.2261 |  | [C <sub>8</sub> H <sub>7</sub> N <sub>2</sub> ] <sup>+</sup> , 131.0610; [C <sub>9</sub> H <sub>9</sub> N <sub>2</sub> ] <sup>+</sup> , 145.0762;<br>[C <sub>9</sub> H <sub>7</sub> N <sub>2</sub> O] <sup>+</sup> , 159.0562; [C <sub>10</sub> H <sub>8</sub> N <sub>2</sub> O] <sup>+</sup> , 172.0639;<br>[C <sub>9</sub> H <sub>8</sub> N <sub>2</sub> O <sub>2</sub> ] <sup>+</sup> , 176.0583; [C <sub>17</sub> H <sub>13</sub> N <sub>4</sub> O] <sup>+</sup> , <b>289.1086</b> ;<br>[C <sub>17</sub> H <sub>16</sub> N <sub>5</sub> O] <sup>+</sup> , <b>306.1357</b> ; [C <sub>13</sub> H <sub>18</sub> N <sub>4</sub> O <sub>3</sub> ] <sup>+</sup> , 317.1037;<br>[C <sub>25</sub> H <sub>22</sub> N <sub>7</sub> O <sub>2</sub> ] <sup>+</sup> , 452.1841                                                         | HLM<br>HIM<br>rhCYP3A4             |

|             |      |                                                                  |                                                                                                                     |                                                                                                                                                                                                                                                                                                                                                                                           |                        |
|-------------|------|------------------------------------------------------------------|---------------------------------------------------------------------------------------------------------------------|-------------------------------------------------------------------------------------------------------------------------------------------------------------------------------------------------------------------------------------------------------------------------------------------------------------------------------------------------------------------------------------------|------------------------|
| <b>M514</b> | 3.35 | $[\text{C}_{27}\text{H}_{28}\text{N}_7\text{O}_4]^+$<br>514.2210 | 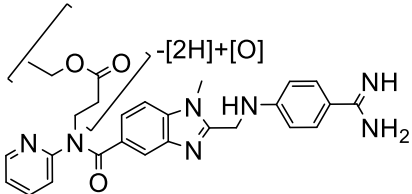<br>$-\text{[2H]}^+ + \text{[O]}$ | $[\text{C}_6\text{H}_7\text{N}_2\text{O}]^+$ , 123.0565; $[\text{C}_7\text{H}_8\text{N}_2\text{O}]^{*+}$ , 136.0629;<br>$[\text{C}_9\text{H}_9\text{N}_2]^+$ , 145.0765, $[\text{C}_{10}\text{H}_8\text{N}_2\text{O}]^{*+}$ , 172.0644;<br><b><math>[\text{C}_{17}\text{H}_{13}\text{N}_4\text{O}]^+</math>, 289.1106</b> ; $[\text{C}_{17}\text{H}_{16}\text{N}_5\text{O}]^+$ , 306.1360 | HLM<br>HIM<br>rhCYP3A4 |
|-------------|------|------------------------------------------------------------------|---------------------------------------------------------------------------------------------------------------------|-------------------------------------------------------------------------------------------------------------------------------------------------------------------------------------------------------------------------------------------------------------------------------------------------------------------------------------------------------------------------------------------|------------------------|

\*The metabolites detected in the HLM and rhCYP3A4 incubations at 10 min, or in the HIM and rhCYP3A5 incubations at 60 min. RT, retention time; NA, not applicable.

Supp. Table 2: DABE and its metabolites detected in NADPH-fortified incubations.

| Species  | RT (min) | [M+H] <sup>+</sup> m/z (amu)                                                              | Structures | Product ion formula [P] <sup>+</sup> or [P] <sup>++</sup> , m/z (amu)                                                                                                                                                                                                                                                                                                                                                                                                                                                                                                                                                                                                                                                    | Detected in*                       |
|----------|----------|-------------------------------------------------------------------------------------------|------------|--------------------------------------------------------------------------------------------------------------------------------------------------------------------------------------------------------------------------------------------------------------------------------------------------------------------------------------------------------------------------------------------------------------------------------------------------------------------------------------------------------------------------------------------------------------------------------------------------------------------------------------------------------------------------------------------------------------------------|------------------------------------|
| DAB      | 1.82     | [C <sub>25</sub> H <sub>26</sub> N <sub>7</sub> O <sub>3</sub> ] <sup>+</sup><br>472.2094 |            | [C <sub>7</sub> H <sub>8</sub> N <sub>2</sub> O] <sup>++</sup> , 136.0619; [C <sub>9</sub> H <sub>9</sub> N <sub>2</sub> ] <sup>+</sup> , 145.0758;<br>[C <sub>10</sub> H <sub>8</sub> N <sub>2</sub> O] <sup>++</sup> , 172.0638; [C <sub>17</sub> H <sub>13</sub> N <sub>4</sub> O] <sup>+</sup> , 289.1092;<br>[C <sub>17</sub> H <sub>16</sub> N <sub>5</sub> O] <sup>+</sup> , 306.1358; [C <sub>17</sub> H <sub>18</sub> N <sub>5</sub> O <sub>2</sub> ] <sup>+</sup> , 324.1452;<br>[C <sub>18</sub> H <sub>17</sub> N <sub>4</sub> O <sub>3</sub> ] <sup>+</sup> , 337.1299; [C <sub>22</sub> H <sub>22</sub> N <sub>7</sub> O] <sup>+</sup> , 400.1852                                                          | HLM<br>HIM<br>rhCYP3A4             |
| M400     | 2.00     | [C <sub>22</sub> H <sub>22</sub> N <sub>7</sub> O] <sup>+</sup><br>400.1891               |            | [C <sub>8</sub> H <sub>7</sub> N <sub>2</sub> ] <sup>+</sup> , 131.0607; [C <sub>7</sub> H <sub>8</sub> N <sub>2</sub> O] <sup>++</sup> , 136.0622;<br>[C <sub>8</sub> H <sub>10</sub> N <sub>3</sub> ] <sup>+</sup> , 148.0873; [C <sub>10</sub> H <sub>8</sub> N <sub>2</sub> O] <sup>++</sup> , 172.0637;<br>[C <sub>15</sub> H <sub>12</sub> N <sub>4</sub> O] <sup>++</sup> , 264.1008; [C <sub>15</sub> H <sub>13</sub> N <sub>4</sub> O] <sup>+</sup> , 265.1091;<br>[C <sub>17</sub> H <sub>13</sub> N <sub>4</sub> O] <sup>+</sup> , <b>289.1087</b> ; [C <sub>22</sub> H <sub>17</sub> N <sub>6</sub> ] <sup>+</sup> , 365.1511;<br>[C <sub>22</sub> H <sub>19</sub> N <sub>6</sub> O] <sup>+</sup> , 383.1621 | HLM<br>HIM                         |
| BIBR0951 | 2.47     | [C <sub>27</sub> H <sub>30</sub> N <sub>7</sub> O <sub>3</sub> ] <sup>+</sup><br>500.2411 |            | [C <sub>9</sub> H <sub>9</sub> N <sub>2</sub> ] <sup>+</sup> , 145.0764; [C <sub>9</sub> H <sub>7</sub> N <sub>2</sub> O] <sup>+</sup> , 159.0563;<br>[C <sub>10</sub> H <sub>8</sub> N <sub>2</sub> O] <sup>++</sup> , 172.0637; [C <sub>13</sub> H <sub>15</sub> N <sub>3</sub> O <sub>3</sub> ] <sup>+</sup> , 261.1129;<br>[C <sub>15</sub> H <sub>12</sub> N <sub>4</sub> O] <sup>+</sup> , 264.0977; [C <sub>17</sub> H <sub>13</sub> N <sub>4</sub> O] <sup>+</sup> , 289.1090;<br>[C <sub>17</sub> H <sub>16</sub> N <sub>5</sub> O] <sup>+</sup> , 306.1354; [C <sub>22</sub> H <sub>17</sub> N <sub>6</sub> ] <sup>+</sup> , 365.1636                                                                          | HLM<br>HIM<br>rhCYP3A4<br>rhCYP3A5 |
| M644 (1) | 3.05     | [C <sub>34</sub> H <sub>42</sub> N <sub>7</sub> O <sub>6</sub> ] <sup>+</sup><br>644.3201 |            | [C <sub>10</sub> H <sub>8</sub> N <sub>2</sub> O] <sup>++</sup> , 172.0617; [C <sub>17</sub> H <sub>13</sub> N <sub>4</sub> O] <sup>+</sup> , <b>289.1084</b> ;<br>[C <sub>17</sub> H <sub>16</sub> N <sub>5</sub> O] <sup>+</sup> , 306.1375; [C <sub>18</sub> H <sub>14</sub> N <sub>5</sub> O <sub>2</sub> ] <sup>+</sup> , 332.1149;<br>[C <sub>27</sub> H <sub>30</sub> N <sub>7</sub> O <sub>3</sub> ] <sup>+</sup> , 500.2356; [C <sub>28</sub> H <sub>28</sub> N <sub>7</sub> O <sub>4</sub> ] <sup>+</sup> , <b>526.2182</b>                                                                                                                                                                                    | HLM<br>HIM<br>rhCYP3A4<br>rhCYP3A5 |
| M644 (2) | 3.11     | [C <sub>34</sub> H <sub>42</sub> N <sub>7</sub> O <sub>6</sub> ] <sup>+</sup><br>644.3207 |            | [C <sub>17</sub> H <sub>13</sub> N <sub>4</sub> O] <sup>+</sup> , 289.1079; [C <sub>15</sub> H <sub>19</sub> N <sub>3</sub> O <sub>3</sub> ] <sup>++</sup> , <b>289.1087</b> ;<br>[C <sub>17</sub> H <sub>16</sub> N <sub>5</sub> O] <sup>+</sup> , 306.1327; [C <sub>18</sub> H <sub>14</sub> N <sub>5</sub> O <sub>2</sub> ] <sup>+</sup> , 332.1152;<br>[C <sub>27</sub> H <sub>28</sub> N <sub>6</sub> O <sub>4</sub> ] <sup>++</sup> , 500.2188; [C <sub>27</sub> H <sub>30</sub> N <sub>7</sub> O <sub>3</sub> ] <sup>+</sup> , 500.2414;<br>[C <sub>28</sub> H <sub>28</sub> N <sub>7</sub> O <sub>4</sub> ] <sup>+</sup> , <b>526.2192</b>                                                                       | HLM<br>HIM<br>rhCYP3A4<br>rhCYP3A5 |

|                      |      |                                                                  |                                                                                    |                                                                                                                                                                                                                                                                                                                                                                                                                                                                                                                                                                          |                                    |
|----------------------|------|------------------------------------------------------------------|------------------------------------------------------------------------------------|--------------------------------------------------------------------------------------------------------------------------------------------------------------------------------------------------------------------------------------------------------------------------------------------------------------------------------------------------------------------------------------------------------------------------------------------------------------------------------------------------------------------------------------------------------------------------|------------------------------------|
| <b>M264</b>          | 3.28 | $[\text{C}_{14}\text{H}_{22}\text{N}_3\text{O}_2]^+$<br>264.1707 | 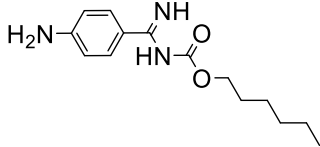 | $[\text{C}_6\text{H}_6\text{N}]^+$ , 92.0501; $[\text{C}_7\text{H}_7\text{N}_2]^+$ , 119.0608; $[\text{C}_7\text{H}_{10}\text{N}_3]^+$ , 136.0872; $[\text{C}_8\text{H}_8\text{N}_3\text{O}]^+$ , 162.0673; $[\text{C}_8\text{H}_{10}\text{N}_3\text{O}_2]^+$ , 180.0775                                                                                                                                                                                                                                                                                                 | HLM<br>HIM<br>rhCYP3A4<br>rhCYP3A5 |
| <b>BIBR1087</b>      | 3.39 | $[\text{C}_{32}\text{H}_{38}\text{N}_7\text{O}_5]^+$<br>600.2928 |  | $[\text{C}_8\text{H}_9\text{N}_2\text{O}]^+$ , 149.0715; $[\text{C}_{17}\text{H}_{13}\text{N}_4\text{O}]^+$ , 289.1089; $[\text{C}_{17}\text{H}_{16}\text{N}_5\text{O}]^+$ , 306.1354; $[\text{C}_{18}\text{H}_{14}\text{N}_5\text{O}_2]^+$ , 332.1150; $[\text{C}_{18}\text{H}_{16}\text{N}_5\text{O}_3]^+$ , 350.1250; $[\text{C}_{24}\text{H}_{28}\text{N}_5\text{O}_3]^+$ , 434.2193; $[\text{C}_{25}\text{H}_{24}\text{N}_7\text{O}_2]^+$ , 454.1993                                                                                                                | HLM<br>HIM<br>rhCYP3A4<br>rhCYP3A5 |
| <b>M528</b>          | 3.64 | $[\text{C}_{29}\text{H}_{34}\text{N}_7\text{O}_3]^+$<br>528.2727 |  | $[\text{C}_8\text{H}_{10}\text{N}_3]^+$ , 148.0871; $[\text{C}_{15}\text{H}_{13}\text{N}_4\text{O}]^+$ , 265.1103; <b><math>[\text{C}_{17}\text{H}_{13}\text{N}_4\text{O}]^+</math>, 289.1096</b> ; $[\text{C}_{17}\text{H}_{16}\text{N}_5\text{O}]^+$ , 306.1361; $[\text{C}_{22}\text{H}_{17}\text{N}_6]^+$ , 365.1508; $[\text{C}_{22}\text{H}_{19}\text{N}_6\text{O}]^+$ , 383.1623; $[\text{C}_{22}\text{H}_{22}\text{N}_7\text{O}]^+$ , 400.1887; <b><math>[\text{C}_{23}\text{H}_{20}\text{N}_7\text{O}_2]^+</math>, 426.1675</b>                                 | HLM<br>HIM<br>rhCYP3A4<br>rhCYP3A5 |
| <b>DABE (parent)</b> | 3.95 | $[\text{C}_{34}\text{H}_{42}\text{N}_7\text{O}_5]^+$<br>628.3240 |  | $[\text{C}_{10}\text{H}_8\text{N}_2\text{O}]^{++}$ , 172.0638; $[\text{C}_{10}\text{H}_9\text{N}_2\text{O}_2]^+$ , 189.0667; <b><math>[\text{C}_{17}\text{H}_{13}\text{N}_4\text{O}]^+</math>, 289.1091</b> ; $[\text{C}_{17}\text{H}_{16}\text{N}_5\text{O}]^+$ , 306.1359; $[\text{C}_{18}\text{H}_{14}\text{N}_5\text{O}_2]^+$ , 332.1149; $[\text{C}_{22}\text{H}_{17}\text{N}_6]^+$ , 365.1613; <b><math>[\text{C}_{24}\text{H}_{28}\text{N}_5\text{O}_3]^+</math>, 434.2194</b> ; <b><math>[\text{C}_{28}\text{H}_{28}\text{N}_7\text{O}_4]^+</math>, 526.2194</b> | NA                                 |

\*The metabolites detected in the HLM, HIM, rhCYP3A4, and rhCYP3A5 incubations at 10 min. RT, retention time; NA, not applicable.

**Supp. Table 3: Formation kinetic of primary metabolites following incubation of either DABE or BIBR0951 in NADPH-fortified rhCYP3A4 and rhCYP3A5.**

| Metabolic reactions        | rhCYP3A4                            |                        |                                    | rhCYP3A5                            |                        |                                    |
|----------------------------|-------------------------------------|------------------------|------------------------------------|-------------------------------------|------------------------|------------------------------------|
|                            | V <sub>max</sub><br>(pmol/min/pmol) | K <sub>m</sub><br>(μM) | CL <sub>int</sub><br>(μL/min/pmol) | V <sub>max</sub><br>(pmol/min/pmol) | K <sub>m</sub><br>(μM) | CL <sub>int</sub><br>(μL/min/pmol) |
| <b>DABE</b>                |                                     |                        |                                    |                                     |                        |                                    |
| BIBR0951 formation         | ND                                  | ND                     | ND                                 | ND                                  | ND                     | ND                                 |
| M644 (1) and (2) formation | NA                                  | 0.6 ± 0.1              | NA                                 | NA                                  | 0.6 ± 0.04             | NA                                 |
| M264 formation             | NA                                  | 0.3 ± 0.1              | NA                                 | NA                                  | 0.3 ± 0.1              | NA                                 |
| BIBR1087 formation         | 2.7 ± 0.1                           | 0.4 ± 0.04             | 7.2 ± 0.5                          | 1.4 ± 0.1                           | 0.6 ± 0.1              | 2.4 ± 0.5                          |
| M528 formation             | NA                                  | 1.4 ± 0.3              | NA                                 | NA                                  | 2.4 ± 0.2              | NA                                 |
| <b>BIBR0951</b>            |                                     |                        |                                    |                                     |                        |                                    |
| DAB formation              | 2.6 ± 0.2                           | 3.7 ± 0.5              | 0.7 ± 0.1                          | 0.9 ± 0.03                          | 2.8 ± 0.3              | 0.3 ± 0.03                         |
| M400 formation             | NA                                  | 2.9 ± 0.1              | NA                                 | NA                                  | 1.2 ± 0.1              | NA                                 |
| M516 (1) formation         | NA                                  | 3.7 ± 0.3              | NA                                 | NA                                  | NA                     | NA                                 |
| M516 (2) formation         | NA                                  | 2.8 ± 0.3              | NA                                 | NA                                  | 1.6 ± 0.4              | NA                                 |
| M498 (1) formation         | NA                                  | 4.6 ± 0.3              | NA                                 | NA                                  | 1.1 ± 0.1              | NA                                 |
| M498 (2) formation         | NA                                  | 3.1 ± 0.3              | NA                                 | NA                                  | NA                     | NA                                 |

Data are expressed as mean ± SD from n=3. NA, not applicable due to lack of analytical standards. ND, no data due to negligible metabolite formation.

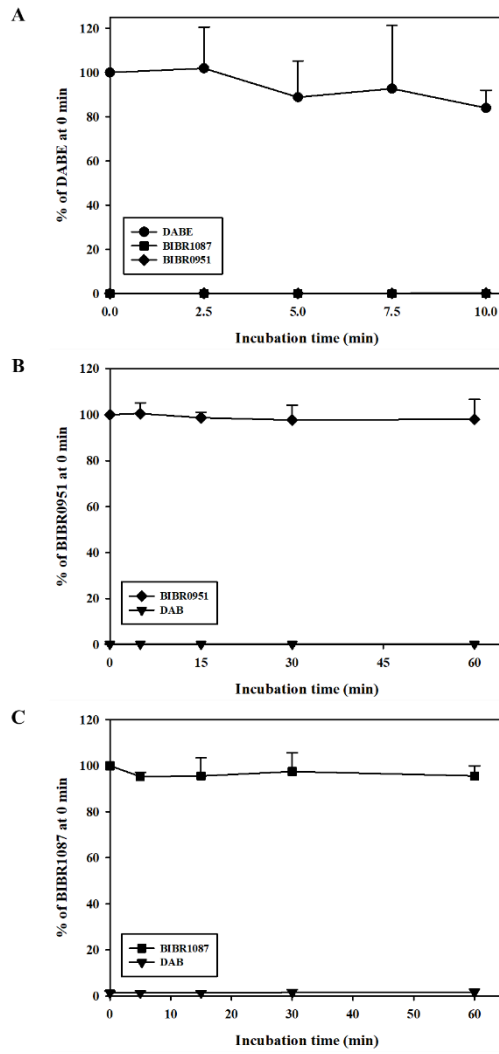

**Supp. Figure 1: Stability of DABE (A), BIBR0951 (B), and BIBR1087 (C) in the phosphate buffer fortified with NADPH (no microsomal protein). Data are expressed as mean  $\pm$  SD from n=3.**



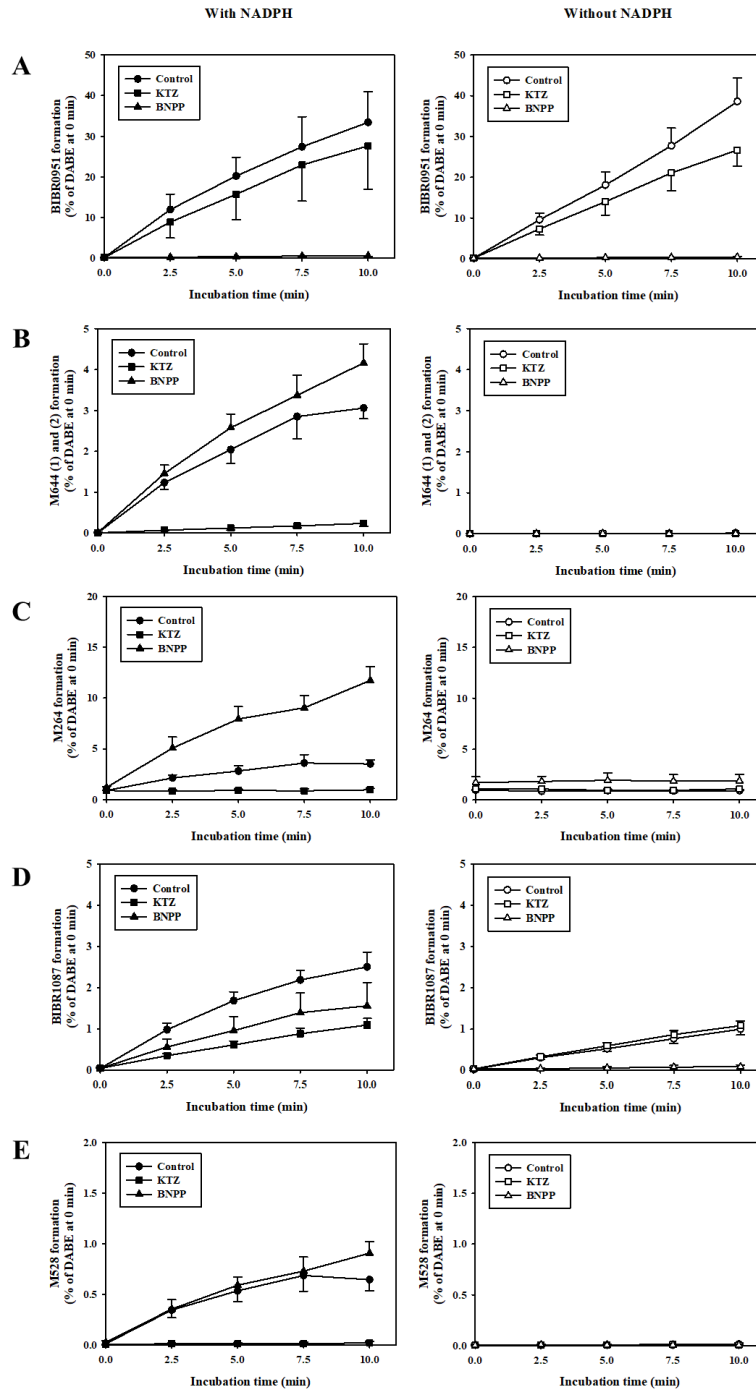

**Supp. Figure 2: Effects of KTZ (1  $\mu$ M) and BNPP (100  $\mu$ M) on the formation of BIBR0951 (A), M644 (1) and (2) (B), M264 (C), BIBR1087 (D), and M528 (E) following incubation of 1  $\mu$ M DABE in HIM with (left panel) or without (right panel) NADPH. Data are expressed as mean  $\pm$  SD from n=3. The formation of M644 (1) and (2) was combined due to incomplete separation of chromatographic peaks.**

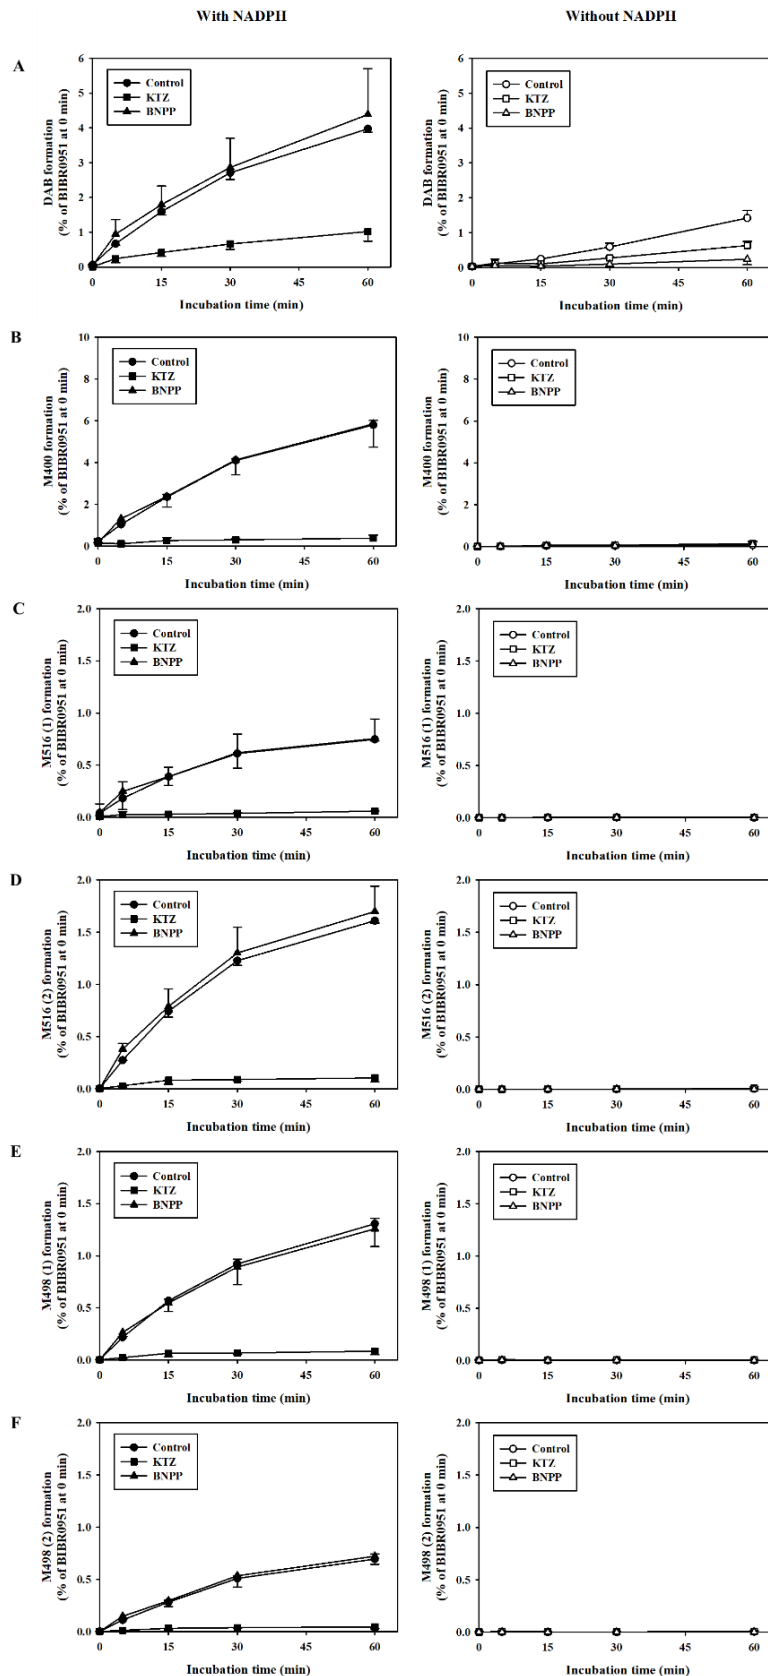

**Supp. Figure 3: Effects of KTZ (1  $\mu$ M) and BNPP (100  $\mu$ M) on the formation of DAB (A), M400 (B), M516 (1) (C), M516 (2) (D), M498 (1) (E), and M498 (2) (F) following incubation of 1  $\mu$ M BBR0951 in HIM with (left panel) or without (right panel) NADPH. Data are expressed as mean  $\pm$  SD from n=3.**

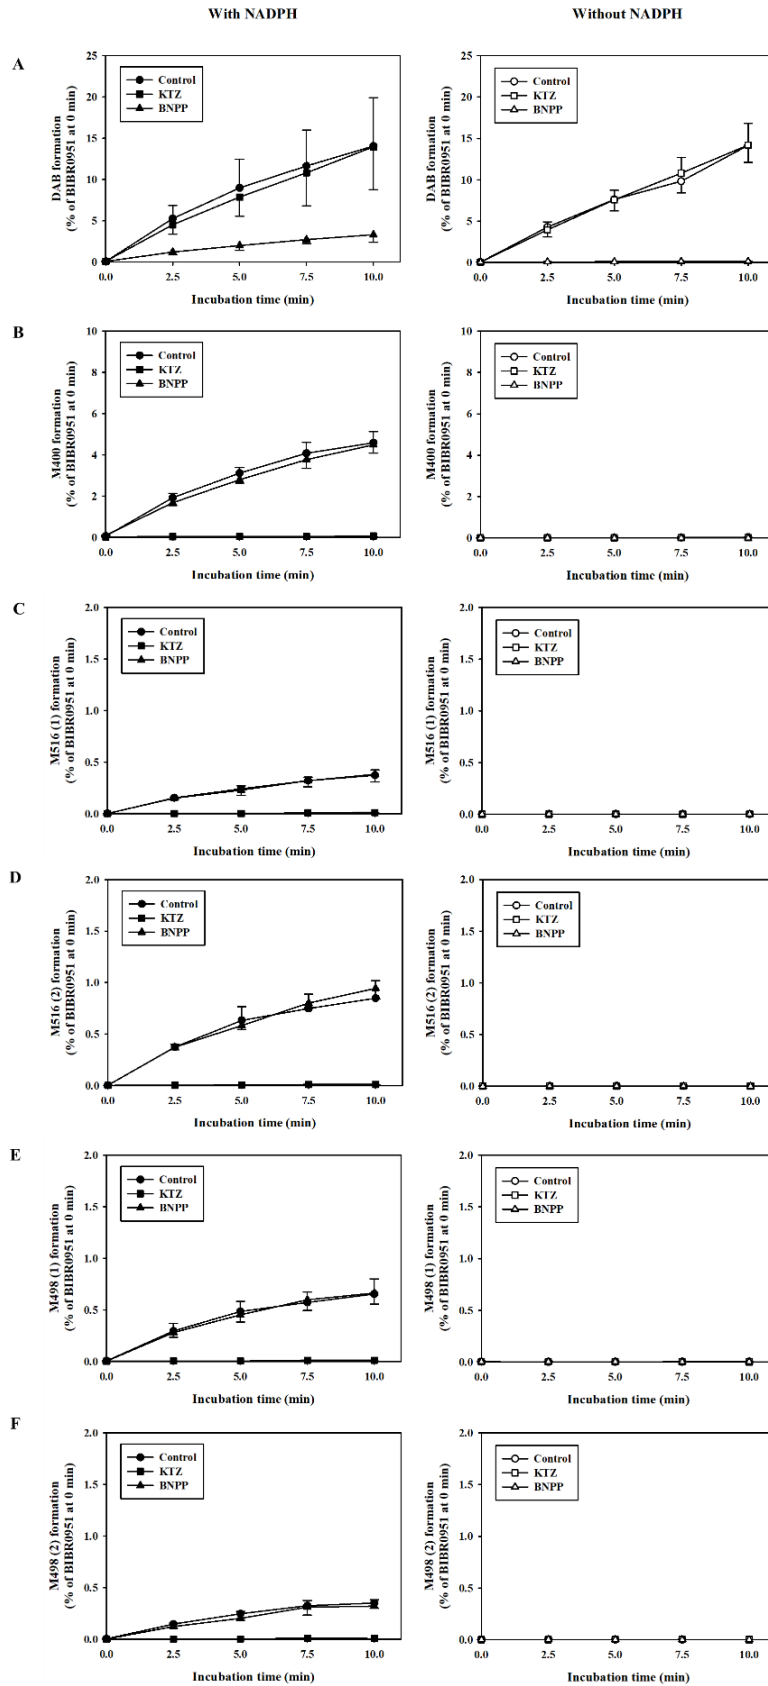

**Supp. Figure 4: Effects of KTZ (1  $\mu$ M) and BNPP (100  $\mu$ M) on the formation of DAB (A), M400 (B), M516 (1) (C), M516 (2) (D), M498 (1) (E), and M498 (2) (F) following incubation of 1  $\mu$ M BIBR0951 in HLM with (left panel) or without (right panel) NADPH. Data are expressed as mean  $\pm$  SD from n=3.**

A

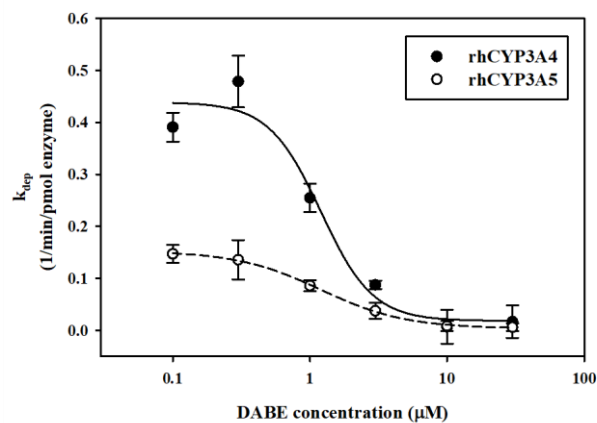

B

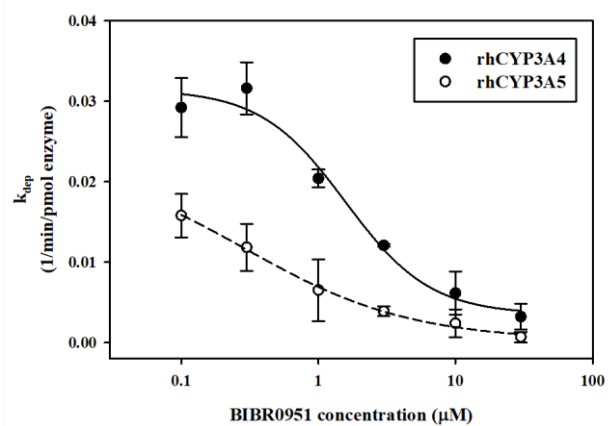

**Supp. Figure 5: Plots of *in vitro* depletion rate constants ( $k_{\text{dep}}$ ) of DABE (A) and BIBR0951 (B) versus concentrations in the NADPH-fortified rhCYP3A4 and rhCYP3A5 systems. Data are expressed as mean  $\pm$  SD from  $n=3$ .**

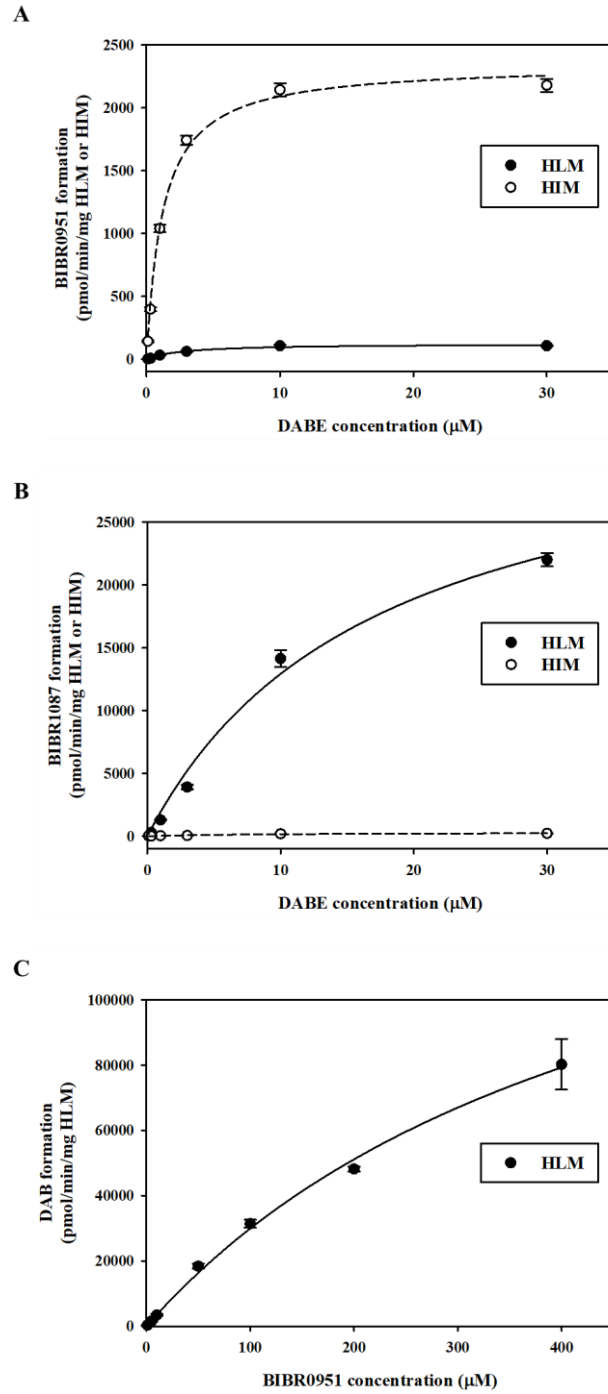

**Supp. Figure 6: Michaelis-Menten kinetics of CES-mediated hydrolysis of DABE (A and B) and BIBR0951 (C) in HLM and HIM. Data are expressed as mean  $\pm$  SD from n=3. The DAB formation was negligible in the HIM incubation with BIBR0951.**

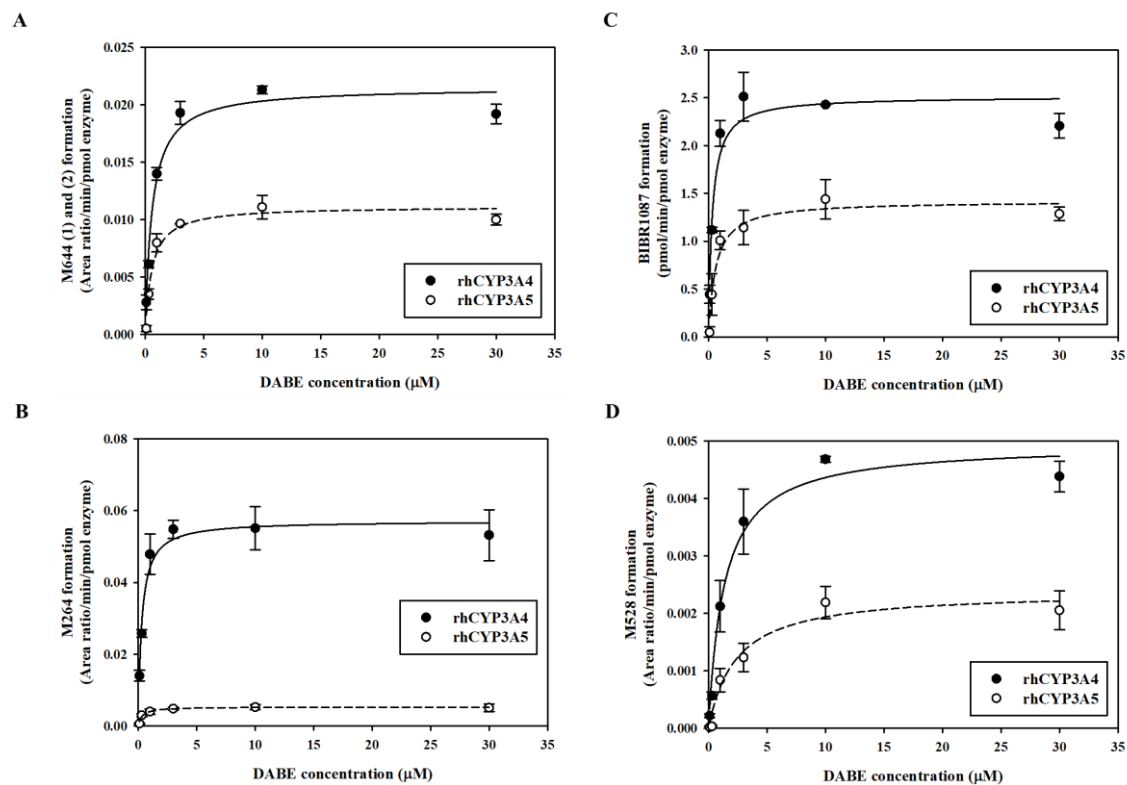

**Supp. Figure 7: The formation of M644 (1) and (2) (A), M264 (B), BIBR1087 (C), and M528 (D) following incubation of DABE in NADPH-fortified rhCYP3A4 and rhCYP3A5 systems. Data are expressed as mean  $\pm$  SD from n=3. The formation of M644 (1) and (2) was combined due to incomplete separation of chromatographic peaks.**

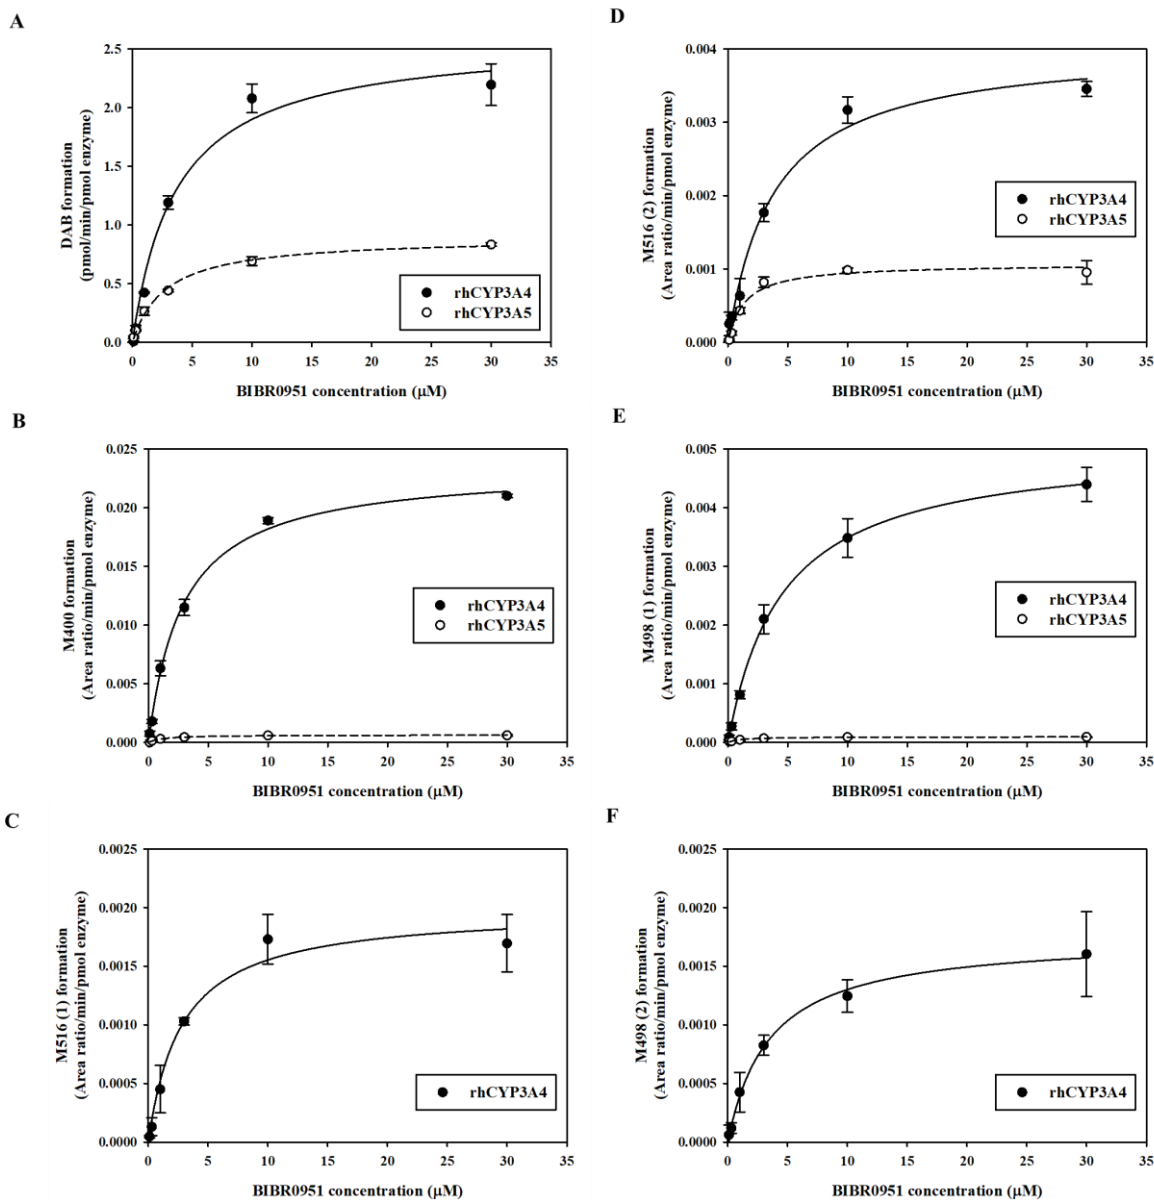

**Supp. Figure 8: The formation of DAB (A), M400 (B), M516 (1) (C), M516 (2) (D), M498 (1) (E), and M498 (2) (F) following incubation of BIBR0951 in NADPH-fortified rhCYP3A4 and rhCYP3A5 systems. Data are expressed as mean  $\pm$  SD from n=3. M516 (1) and M498 (2) were not formed in the rhCYP3A5 system.**

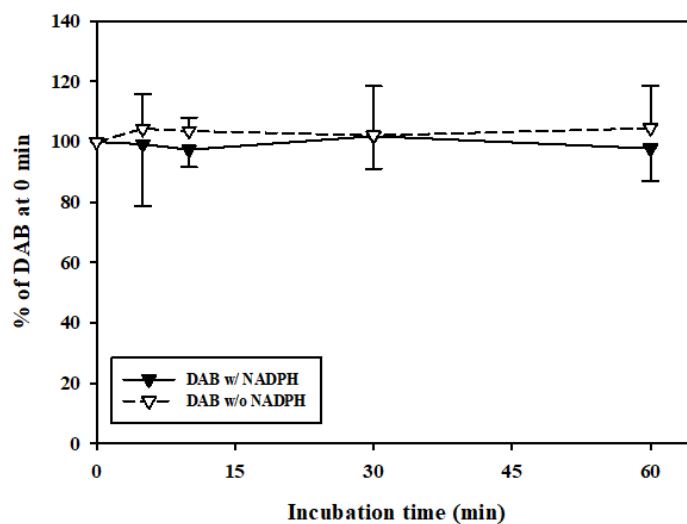

**Supp. Figure 9: Metabolic stability of DAB (1  $\mu$ M) in HLM (0.5 mg/mL). Black symbols and solid lines represent the incubations with NADPH, whereas white symbols and dashed lines represent the incubations without NADPH. Data are expressed as % of DAB compared to 0 min (mean  $\pm$  SD from n = 3).**
